# Supplementary material for: Sugar and abscisic acid signaling orthologs are activated at the onset of ripening in grape
Source: PubMed Central journal article supplement — Planta. 2010 Apr 21;232(1):219–34. doi: 10.1007/s00425-010-1165-2 (PMC2872022; doi:10.1007/s00425-010-1165-2), 2010-04-21
Supplement: 425_2010_1165_MOESM1_ESM.pdf [file 425_2010_1165_MOESM1_ESM.pdf]

Supplemental Figures

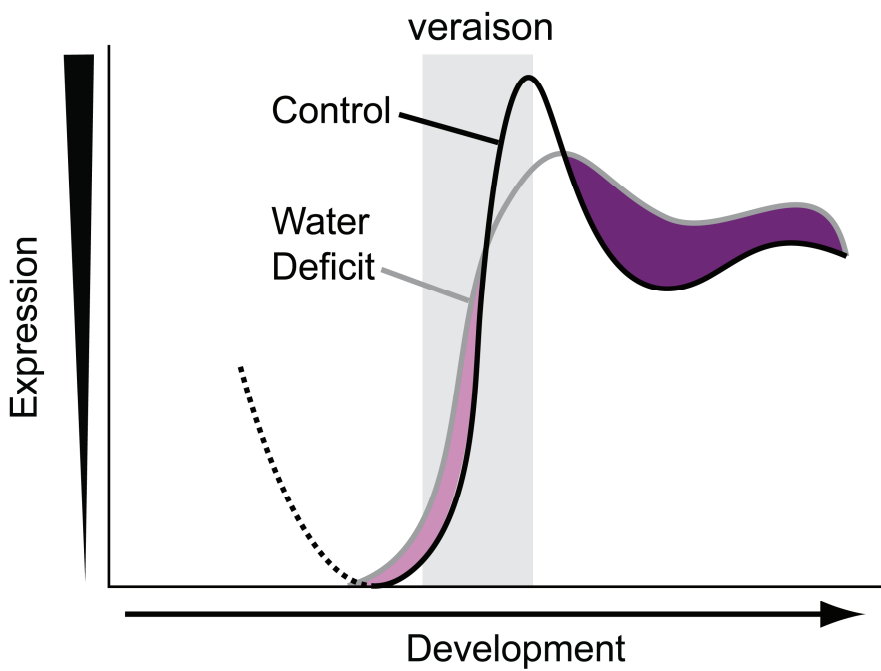

**Suppl. Fig. 1** Characteristic changes in the expression of core flavonoid and anthocyanin specific genes in response to water deficit from Castellarin et al. 2007a

Review

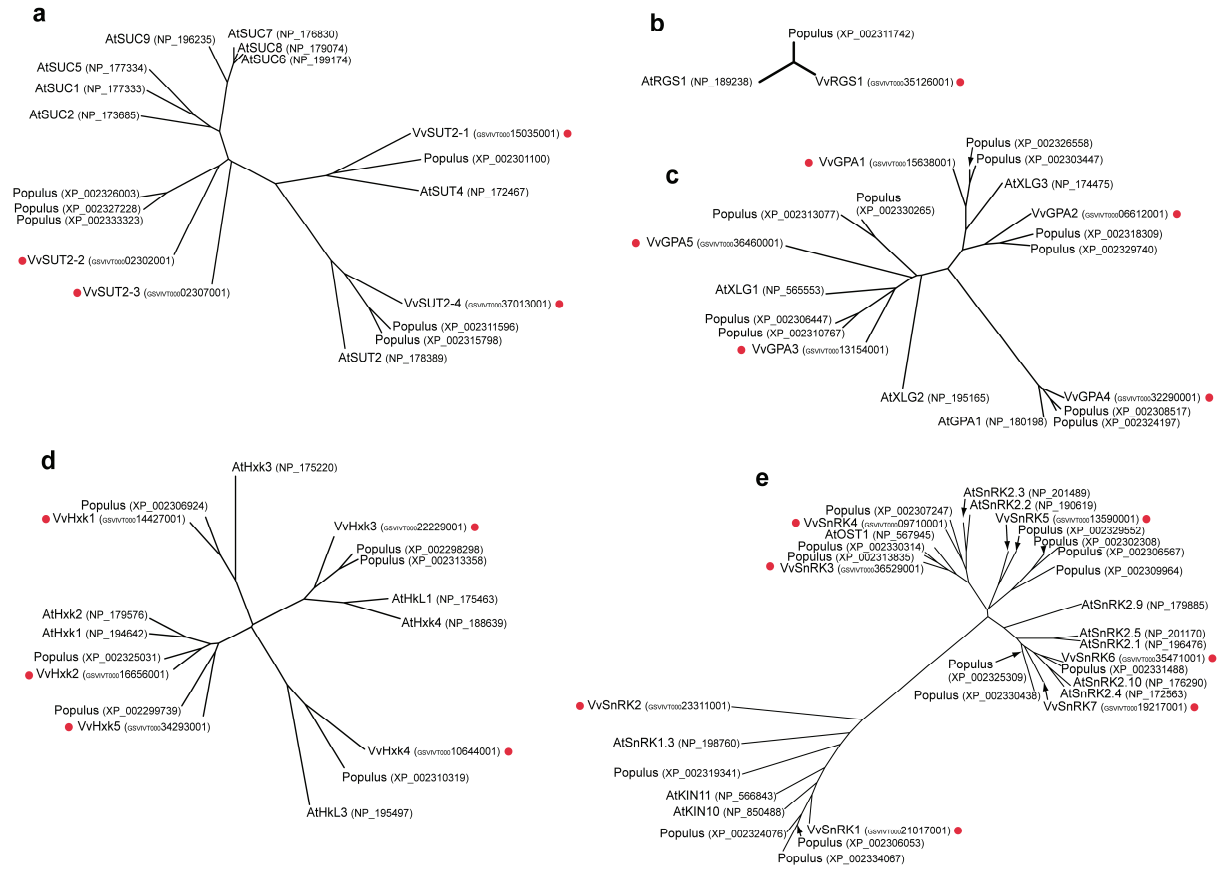

**Suppl. Fig. 2** Unrooted dendrograms of the SUC (a), RGS1 (b) and GPA1 (c), Hxk (d), and SnRK (e) protein families with *Vitis vinifera* (red dots), Arabidopsis, and *Populus trichocarpa* orthologs included. NCBI and *Vitis* Genoscope accessions are given

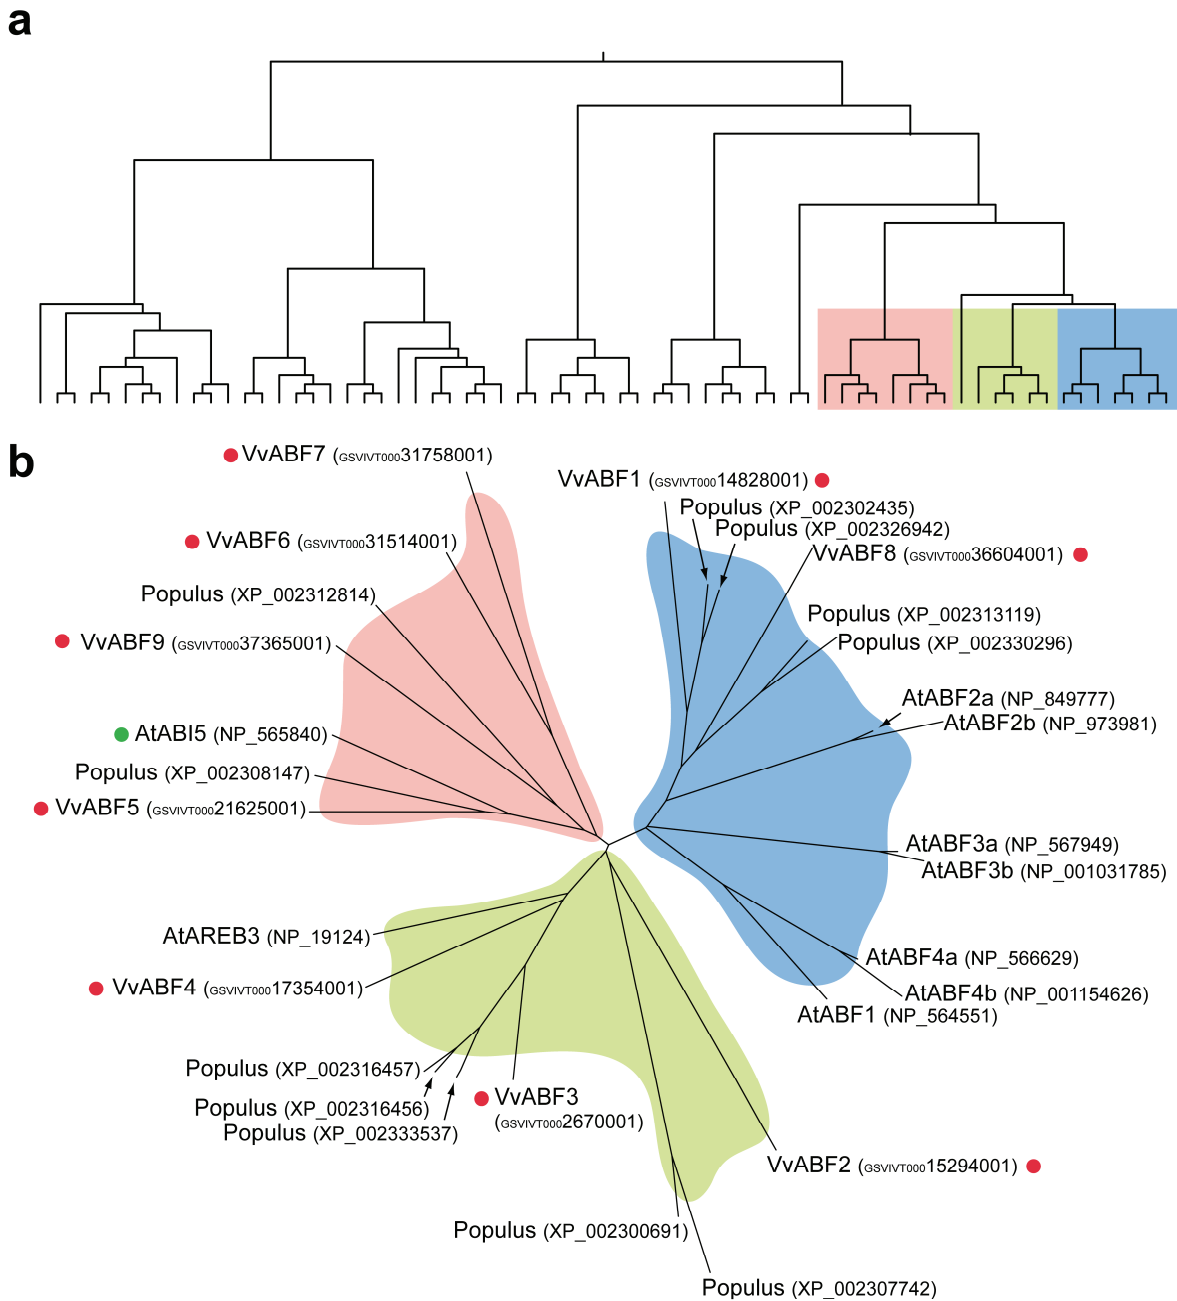

**Suppl. Fig. 3** *Vitis vinifera* orthologs of the ABA related ABF transcription factors. **(a)** Rooted dendrogram of the entire Arabidopsis ABF family with nested grape orthologs. Sub-groups containing the ABA insensitive mutant *abi5* are colored. **(b)** Unrooted dendrogram of clustering *AtABI5* (green dot) and other *Vitis vinifera* (red dots), Arabidopsis, and *Populus trichocarpa* orthologs. NCBI and *Vitis* Genoscope accessions are given

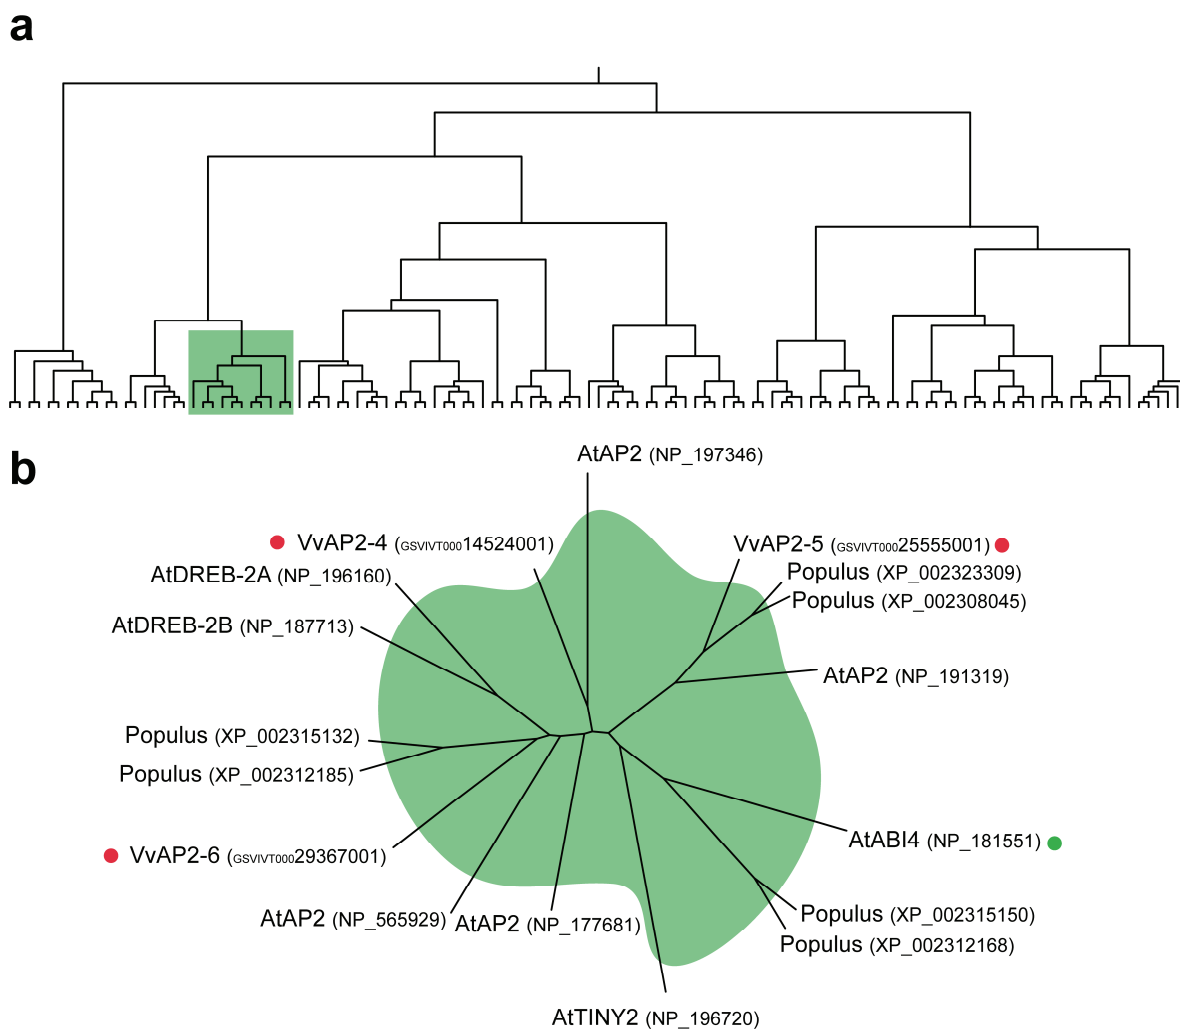

1  
2  
3  
4  
5  
6  
7

**Suppl. Fig. 4** *Vitis vinifera* orthologs of the ABA related AP2 transcription factors. **(a)** Rooted dendrogram of the entire Arabidopsis AP2 family with nested grape orthologs. Sub-group containing the ABA insensitive mutant *abi4* is colored. **(b)** Unrooted dendrogram of clustering AtABI4 (green dot) and other *Vitis vinifera* (red dots), Arabidopsis, and *Populus trichocarpa* orthologs. NCBI and *Vitis* Genoscope accessions are given

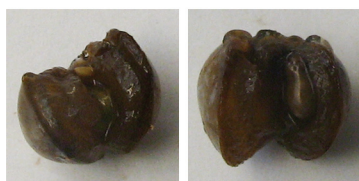

**Suppl. Fig. 5** Exploding berries. 200  $\mu\text{M}$  ABA alone and 2% sucrose + ABA treatments were not included in our analyses because of a phenomenon where the berries exploded reproducibly (shown here). Berries cultured on 2% sucrose + 200  $\mu\text{M}$  ABA had average weight gains during the culture experiment of 45%, over double that of the healthy 2% sucrose controls

For Peer Review

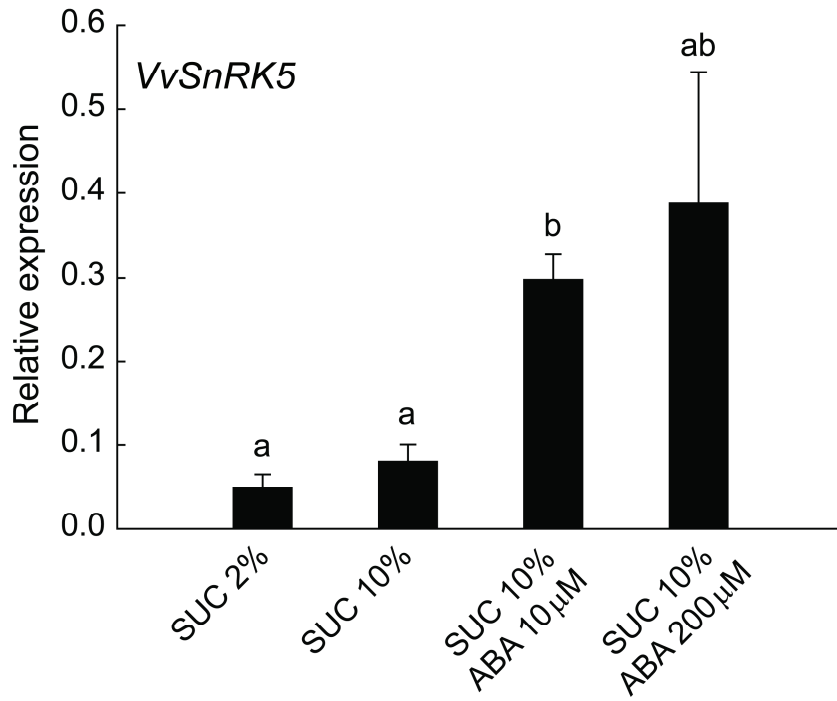

1  
2  
3  
4  
5  
6  
7  
8  
9  
10  
11  
12  
13  
14  
15  
16  
17  
18  
19  
20  
21  
22  
23  
24  
25  
26  
27  
28  
29  
30  
31  
32  
33  
34  
35  
36  
37  
38  
39  
40  
41  
42  
43  
44  
45  
46  
47  
48  
49  
50  
51  
52  
53  
54  
55  
56  
57  
58  
59  
60

**Suppl. Fig. 6** *VvSnRK5* expression in berry culture under various treatments. Values are means with bars representing SE. Different letters denote significant differences ( $P < 0.05$ ; Tukey's HSD,  $n = 3$ )

## Supplemental File 1

Expression (log<sub>2</sub> copies/ng RNA) of all genes during berry ripening in control (C) and water deficit (ED) treatments.

| Family Number | Gene                                     | Treatment             | Developmental time <sup>#</sup> |        |          |        |        |         | P*     |
|---------------|------------------------------------------|-----------------------|---------------------------------|--------|----------|--------|--------|---------|--------|
|               |                                          |                       | I                               |        | II       |        | III    |         |        |
| Stage         | Description                              | Dates                 | 33 DAA                          | 57 DAA | OR green | OR red | 81 DAA | 123 DAA |        |
| I             | Prior to the onset of ripening           | 33 and 57 DAA         |                                 |        |          |        |        |         |        |
| II            | OR, The Onset of Ripening (50% veraison) | C. 74 DAA; ED, 67 DAA |                                 |        |          |        |        |         |        |
| III           | After the onset of ripening              | 81 and 123 DAA        |                                 |        |          |        |        |         |        |
| 1             | Sut2-1                                   | C                     | 7.22                            | 6.10   | 8.58     | 8.74   | 9.41   | 10.54   | 0.0054 |
|               |                                          | ED                    | 5.94                            | 6.43   | 8.69     | 8.81   | 8.46   | 10.19   | 0.0075 |
| 1             | Sut2-2                                   | C                     | 7.61                            | 6.71   | 6.23     | 4.75   | 4.73   | 2.88    | 0.0003 |
|               |                                          | ED                    | 6.65                            | 7.66   | 6.42     | 4.81   | 4.18   | 2.77    | 0.0022 |
| 1             | Sut2-3                                   | C                     | 5.55                            | 6.11   | 5.79     | 5.49   | 5.51   | 4.99    | ns     |
|               |                                          | ED                    | 5.96                            | 6.43   | 5.78     | 4.86   | 5.96   | 6.41    | ns     |
| 1             | Sut2-4                                   | C                     | 6.81                            | 5.69   | 7.33     | 8.04   | 8.83   | 9.34    | 0.0001 |
|               |                                          | ED                    | 5.24                            | 6.08   | 7.42     | 7.53   | 8.52   | 9.24    | 0.0269 |
| 2             | GPA1                                     | C                     | 7.40                            | 6.32   | 7.89     | 7.79   | 8.63   | 9.24    | ns     |
|               |                                          | ED                    | 7.11                            | 6.80   | 8.58     | 8.74   | 7.53   | 9.08    | ns     |
| 2             | GPA3                                     | C                     | 5.18                            | 4.53   | 7.25     | 7.48   | 8.69   | 9.91    | 0.0009 |
|               |                                          | ED                    | 4.37                            | 4.98   | 8.18     | 8.64   | 8.17   | 8.05    | ns     |
| 2             | GPA4                                     | C                     | 5.54                            | 4.45   | 6.61     | 7.14   | 7.59   | 7.52    | 0.0111 |
|               |                                          | ED                    | 4.75                            | 5.20   | 7.54     | 7.49   | 6.86   | 7.14    | ns     |
| 3             | RGS1                                     | C                     | 5.66                            | 5.30   | 6.82     | 7.46   | 7.88   | 8.27    | 0.0060 |
|               |                                          | ED                    | 5.32                            | 5.89   | 7.31     | 7.62   | 7.38   | 8.20    | ns     |
| 4             | Hxk1                                     | C                     | 7.52                            | 5.97   | 7.13     | 7.22   | 7.65   | 8.07    | 0.0287 |
|               |                                          | ED                    | 6.60                            | 6.54   | 8.07     | 7.17   | 7.00   | 7.45    | ns     |
| 4             | Hxk2                                     | C                     | 8.34                            | 7.44   | 9.04     | 9.62   | 10.25  | 11.63   | 0.0006 |
|               |                                          | ED                    | 7.12                            | 7.83   | 10.02    | 9.99   | 9.65   | 11.87   | 0.0099 |
| 4             | Hxk3                                     | C                     | 5.64                            | 4.51   | 5.62     | 6.04   | 7.01   | 7.55    | 0.0033 |
|               |                                          | ED                    | 4.25                            | 5.30   | 5.75     | 5.62   | 6.19   | 7.78    | 0.0293 |
| 4             | Hxk4                                     | C                     | 4.79                            | 4.21   | 3.75     | 4.02   | 4.05   | 3.66    | ns     |
|               |                                          | ED                    | 3.94                            | 4.50   | 2.99     | 2.53   | 3.38   | 4.62    | ns     |
| 5             | PP2C-1                                   | C                     | 5.37                            | 3.92   | 5.19     | 4.96   | 6.01   | 6.63    | ns     |
|               |                                          | ED                    | 3.84                            | 4.19   | 5.62     | 4.80   | 4.77   | 6.21    | ns     |
| 5             | PP2C-3                                   | C                     | 7.54                            | 6.58   | 9.06     | 10.12  | 10.52  | 11.76   | 0.0000 |
|               |                                          | ED                    | 6.72                            | 7.88   | 10.81    | 10.84  | 9.85   | 12.08   | 0.0028 |
| 5             | PP2C-5                                   | C                     | 7.46                            | 6.93   | 8.14     | 7.49   | 8.95   | 9.79    | ns     |
|               |                                          | ED                    | 5.26                            | 5.72   | 7.97     | 9.05   | 7.26   | 7.77    | ns     |
| 5             | PP2C-6                                   | C                     | 5.16                            | 4.66   | 8.01     | 7.74   | 8.09   | 9.22    | 0.0052 |
|               |                                          | ED                    | 4.28                            | 4.68   | 8.69     | 8.34   | 6.44   | 8.45    | 0.0391 |
| 5             | PP2C-7                                   | C                     | 6.37                            | 4.12   | 6.11     | 5.54   | 6.95   | 7.41    | 0.0292 |
|               |                                          | ED                    | 5.40                            | 4.91   | 7.46     | 6.71   | 6.21   | 7.23    | ns     |
| 5             | PP2C-9                                   | C                     | 6.50                            | 4.85   | 7.55     | 7.32   | 8.72   | 9.01    | 0.0035 |
|               |                                          | ED                    | 4.92                            | 5.38   | 8.28     | 7.76   | 7.45   | 8.81    | 0.0350 |
| 6             | SnRK1                                    | C                     | 8.37                            | 7.22   | 8.49     | 8.88   | 9.59   | 11.49   | 0.0015 |
|               |                                          | ED                    | 7.01                            | 7.51   | 9.09     | 8.18   | 8.99   | 11.04   | 0.0198 |
| 6             | SnRK3                                    | C                     | 5.95                            | 5.30   | 6.30     | 6.92   | 7.99   | 9.07    | 0.0048 |
|               |                                          | ED                    | 4.67                            | 4.82   | 6.68     | 6.95   | 6.92   | 9.29    | 0.0077 |
| 6             | SnRK4                                    | C                     | 5.06                            | 4.48   | 4.95     | 4.71   | 5.52   | 5.83    | ns     |
|               |                                          | ED                    | 3.45                            | 4.68   | 4.82     | 3.77   | 4.58   | 5.42    | ns     |

|    |    |        |    |      |      |      |      |       |       |        |
|----|----|--------|----|------|------|------|------|-------|-------|--------|
| 1  |    |        |    |      |      |      |      |       |       |        |
| 2  | 6  | SnRK5  | C  | 6.66 | 5.97 | 7.79 | 8.01 | 8.26  | 9.50  | 0.0001 |
| 3  |    |        | ED | 6.00 | 5.79 | 8.95 | 8.93 | 7.08  | 10.37 | 0.0127 |
| 4  | 6  | SnRK6  | C  | 7.40 | 6.62 | 8.27 | 8.73 | 9.18  | 10.51 | 0.0063 |
| 5  |    |        | ED | 6.87 | 7.84 | 9.66 | 9.74 | 8.98  | 10.26 | ns     |
| 6  | 6  | SnRK7  | C  | 6.50 | 4.90 | 7.64 | 7.50 | 8.76  | 7.53  | 0.0083 |
| 7  |    |        | ED | 6.25 | 4.92 | 8.09 | 8.36 | 7.68  | 7.20  | ns     |
| 8  | 7  | WRKY1  | C  | 7.10 | 7.01 | 7.86 | 8.20 | 8.78  | 9.10  | ns     |
| 9  |    |        | ED | 5.84 | 8.69 | 8.48 | 8.32 | 8.24  | 9.46  | ns     |
| 10 | 7  | WRKY2  | C  | 4.73 | 5.32 | 6.02 | 6.18 | 6.10  | 5.97  | ns     |
| 11 |    |        | ED | 4.12 | 6.28 | 5.53 | 5.02 | 5.27  | 6.27  | ns     |
| 12 | 7  | WRKY3  | C  | 5.98 | 4.52 | 5.98 | 6.03 | 8.02  | 8.26  | 0.0408 |
| 13 |    |        | ED | 5.04 | 5.98 | 7.16 | 6.05 | 7.86  | 8.85  | 0.0303 |
| 14 | 7  | WRKY5  | C  | 4.40 | 3.75 | 5.37 | 6.16 | 6.99  | 7.35  | 0.0069 |
| 15 |    |        | ED | 2.50 | 4.70 | 6.60 | 6.17 | 6.50  | 8.03  | 0.0021 |
| 16 | 7  | WRKY6  | C  | 3.83 | 2.25 | 4.95 | 5.00 | 6.10  | 6.63  | 0.0160 |
| 17 |    |        | ED | 2.69 | 3.31 | 5.73 | 5.61 | 4.92  | 6.71  | 0.0079 |
| 18 | 7  | WRKY16 | C  | 0.89 | 0.00 | 0.79 | 2.32 | 3.04  | 2.36  | ns     |
| 19 |    |        | ED | 0.00 | 0.00 | 2.79 | 2.87 | 2.45  | 3.07  | ns     |
| 20 | 7  | WRKY18 | C  | 5.81 | 4.39 | 6.75 | 4.32 | 8.28  | 7.37  | ns     |
| 21 |    |        | ED | 5.22 | 5.79 | 8.49 | 7.79 | 7.64  | 8.12  | ns     |
| 22 | 7  | WRKY19 | C  | 8.43 | 6.45 | 7.95 | 7.62 | 9.01  | 9.04  | ns     |
| 23 |    |        | ED | 7.24 | 7.33 | 8.80 | 8.91 | 7.87  | 9.11  | ns     |
| 24 | 8  | HB2    | C  | 8.16 | 7.38 | 8.06 | 8.24 | 7.04  | 5.76  | ns     |
| 25 |    |        | ED | 6.33 | 7.35 | 8.55 | 8.59 | 4.95  | 4.88  | 0.0205 |
| 26 | 8  | HB3    | C  | 8.49 | 8.10 | 9.64 | 8.84 | 11.05 | 9.63  | ns     |
| 27 |    |        | ED | 7.14 | 7.87 | 9.96 | 8.79 | 9.47  | 10.22 | ns     |
| 28 | 8  | HB4    | C  | 6.38 | 4.90 | 8.23 | 8.69 | 9.56  | 9.09  | 0.0012 |
| 29 |    |        | ED | 3.99 | 4.48 | 8.28 | 7.57 | 7.91  | 9.03  | 0.0037 |
| 30 | 8  | HB8    | C  | 5.37 | 3.18 | 7.85 | 8.35 | 8.44  | 2.94  | 0.0001 |
| 31 |    |        | ED | 4.23 | 6.03 | 8.16 | 7.95 | 6.85  | 7.37  | ns     |
| 32 | 9  | ABF1   | C  | 6.34 | 5.93 | 8.77 | 8.47 | 8.72  | 9.38  | 0.0002 |
| 33 |    |        | ED | 4.98 | 5.95 | 9.94 | 9.21 | 7.89  | 8.97  | 0.0066 |
| 34 | 10 | AP2-6  | C  | 4.53 | 3.14 | 5.95 | 5.50 | 6.95  | 7.04  | 0.0293 |
| 35 |    |        | ED | 2.12 | 3.93 | 5.78 | 4.96 | 5.72  | 6.47  | 0.0193 |

# for expression summary in Figs. 1 and 2 values in each stage (I, II, III) were averaged

\* P values for ANOVAs of expression with time

red type denotes significant differences between treatments ( $P < 0.05$ ; Tukey's HSD)



## Supplemental File 1

| Family | Gene      | Genoscope accession | Primer  | Sequence                  |
|--------|-----------|---------------------|---------|---------------------------|
| 1      | SUT2-1    | GSVIVT00015035001   | forward | taggtcaagggttatcaatgggtg  |
|        |           |                     | reverse | ctacaagtcactggcgaatgctg   |
| 1      | SUT2-2    | GSVIVT00002302001   | forward | tgtgcttggcactgacggta      |
|        |           |                     | reverse | tggaatgctgtaggtgatcgcaa   |
| 1      | SUT2-3    | GSVIVT00002307001   | forward | gcagctcgttgatgggtggg      |
|        |           |                     | reverse | tggaggcatcaagcttctgc      |
| 1      | SUT2-4    | GSVIVT00037013001   | forward | gctggttgggcatgagca        |
|        |           |                     | reverse | aggaaagccaagaagagcaaacac  |
| 2      | GPA1-1    | GSVIVT00015638001   | forward | ctacctgatgatcgtagtcca     |
|        |           |                     | reverse | acacagaacactacagctcga     |
| 2      | GPA1-2    | GSVIVT00006612001   | forward | agtcaactcagagcaatggtcttcg |
|        |           |                     | reverse | agccatttgacccatcatgca     |
| 2      | GPA1-3    | GSVIVT00013154001   | forward | tggcaggaatttgaagcca       |
|        |           |                     | reverse | tatcaacggcccgtccaagaa     |
| 2      | GPA1-4    | GSVIVT00032290001   | forward | gcaagaattcgtacaacaggtgctc |
|        |           |                     | reverse | ggtcactcgttaatagcagcac    |
| 2      | GPA1-5    | GSVIVT00036460001   | forward | gaggtatgcattgttcagcgca    |
|        |           |                     | reverse | agcatttgagagcatttcccagg   |
| 3      | RGS1-1    | GSVIVT00035126001   | forward | cctggcaaaggattactggtcgtc  |
|        |           |                     | reverse | tgaaggatgttctcgtggaagg    |
| 4      | HXK-1     | GSVIVT00014427001   | forward | tgaccatctggatgctgttga     |
|        |           |                     | reverse | tggagaatccctacaatgcctgca  |
| 4      | HXK-2     | GSVIVT00016656001   | forward | gtgtgatattgtgctactcgtgg   |
|        |           |                     | reverse | ttgaggggtcctccaagcag      |
| 4      | HXK-3     | GSVIVT00022229001   | forward | ccccgaattgatggaagtgcga    |
|        |           |                     | reverse | ttcaggatcccaacaatgcctg    |
| 4      | HXK-4     | GSVIVT00010644001   | forward | taaggtcacctgatatggctgc    |
|        |           |                     | reverse | aagacgagctccacgttctgca    |
| 4      | HXK-5     | GSVIVT00034293001   | forward | agtttctggcatgtattggcgca   |
|        |           |                     | reverse | gactgatgtgcatgatgcatgg    |
| 5      | VvPP2C-1  | GSVIVT00016515001   | forward | tgtgtcgtggaaaagtacctgtgc  |
|        |           |                     | reverse | aacgccacatacacgtaagccgtc  |
| 5      | VvPP2C-2  | GSVIVT00016669001   | forward | atgaagttggagaggtggctcg    |
|        |           |                     | reverse | gtctgagctatttctcccgtatgc  |
| 5      | VvPP2C-3  | GSVIVT00018423001   | forward | atggtcagtggagctgaattgc    |
|        |           |                     | reverse | atcaggcttgggtcggatgacag   |
| 5      | VvPP2C-4  | GSVIVT00006760001   | forward | tctgaagccatagtgacccccaa   |
|        |           |                     | reverse | gcatttctcacaatctgcagg     |
| 5      | VvPP2C-5  | GSVIVT00024072001   | forward | gtggaggatgagagagacgggta   |
|        |           |                     | reverse | tttgaccaccatgccatcaa      |
| 5      | VvPP2C-6  | GSVIVT00024235001   | forward | ccaaaccacgaatggctcgcacta  |
|        |           |                     | reverse | gcatttctcaacctgactccgta   |
| 5      | VvPP2C-7  | GSVIVT00032224001   | forward | gagtgattcccttcagtgac      |
|        |           |                     | reverse | cacactacgaacaagtgtccac    |
| 5      | VvPP2C-8  | GSVIVT00038525001   | forward | agccctgaagaggtgcttcag     |
|        |           |                     | reverse | tcagtggtgataatagccacc     |
| 5      | VvPP2C-9  | GSVIVT00034142001   | forward | ggtcaaattgtgctaaggcga     |
|        |           |                     | reverse | gcagatgcctcaaatcagaccca   |
| 5      | VvPP2C-10 | GSVIVT00034305001   | forward | agtgcacttacgccgctgagga    |
|        |           |                     | reverse | ccgttactccattcatcaccac    |
| 6      | SnRK-1    | GSVIVT00021017001   | forward | gttgagaatgatggtgttccagg   |
|        |           |                     | reverse | tgagcaaggaaagctgcacaa     |

|    | Family | Gene | Genoscope accession | Primer | Sequence |
|----|--------|------|---------------------|--------|----------|
| 1  |        |      |                     |        |          |
| 2  |        |      |                     |        |          |
| 3  |        |      |                     |        |          |
| 4  |        |      |                     |        |          |
| 5  |        |      |                     |        |          |
| 6  |        |      |                     |        |          |
| 7  |        |      |                     |        |          |
| 8  |        |      |                     |        |          |
| 9  |        |      |                     |        |          |
| 10 |        |      |                     |        |          |
| 11 |        |      |                     |        |          |
| 12 |        |      |                     |        |          |
| 13 |        |      |                     |        |          |
| 14 |        |      |                     |        |          |
| 15 |        |      |                     |        |          |
| 16 |        |      |                     |        |          |
| 17 |        |      |                     |        |          |
| 18 |        |      |                     |        |          |
| 19 |        |      |                     |        |          |
| 20 |        |      |                     |        |          |
| 21 |        |      |                     |        |          |
| 22 |        |      |                     |        |          |
| 23 |        |      |                     |        |          |
| 24 |        |      |                     |        |          |
| 25 |        |      |                     |        |          |
| 26 |        |      |                     |        |          |
| 27 |        |      |                     |        |          |
| 28 |        |      |                     |        |          |
| 29 |        |      |                     |        |          |
| 30 |        |      |                     |        |          |
| 31 |        |      |                     |        |          |
| 32 |        |      |                     |        |          |
| 33 |        |      |                     |        |          |
| 34 |        |      |                     |        |          |
| 35 |        |      |                     |        |          |
| 36 |        |      |                     |        |          |
| 37 |        |      |                     |        |          |
| 38 |        |      |                     |        |          |
| 39 |        |      |                     |        |          |
| 40 |        |      |                     |        |          |
| 41 |        |      |                     |        |          |
| 42 |        |      |                     |        |          |
| 43 |        |      |                     |        |          |
| 44 |        |      |                     |        |          |
| 45 |        |      |                     |        |          |
| 46 |        |      |                     |        |          |
| 47 |        |      |                     |        |          |
| 48 |        |      |                     |        |          |
| 49 |        |      |                     |        |          |
| 50 |        |      |                     |        |          |
| 51 |        |      |                     |        |          |
| 52 |        |      |                     |        |          |
| 53 |        |      |                     |        |          |
| 54 |        |      |                     |        |          |
| 55 |        |      |                     |        |          |
| 56 |        |      |                     |        |          |
| 57 |        |      |                     |        |          |
| 58 |        |      |                     |        |          |
| 59 |        |      |                     |        |          |
| 60 |        |      |                     |        |          |

| Family | Gene      | Genoscope accession | Primer  | Sequence                  |
|--------|-----------|---------------------|---------|---------------------------|
| 8      | VvATHB-9  | GSVIVT00027741001   | forward | tgaggcttctagagacaagcttcg  |
|        |           |                     | reverse | gtcaagctccaagttctgcgctc   |
| 8      | VvATHB-10 | GSVIVT00037197001   | forward | agtcggatagtaagcttgaggcga  |
|        |           |                     | reverse | gcatcgtagctagctctgagtg    |
| 9      | VvABF-1   | GSVIVT00014828001   | forward | atggaattggaagcagaggttgca  |
|        |           |                     | reverse | tcagtgtgcgctcaagcaacg     |
| 9      | VvABF-2   | GSVIVT00015294001   | forward | tttcgagggctccagccattgag   |
|        |           |                     | reverse | ctcatctgaaaaccagcgctcc    |
| 9      | VvABF-3   | GSVIVT00002670001   | forward | ggaaaagagtttcccaagagga    |
|        |           |                     | reverse | cagacgtgaaactttgttctccag  |
| 9      | VvABF-4   | GSVIVT00017354001   | forward | aagactgttgaaaggcggcta     |
|        |           |                     | reverse | aagctggtactttggtctgtcga   |
| 9      | VvABF-5   | GSVIVT00021625001   | forward | gcaacatcagtagcgggtgtacca  |
|        |           |                     | reverse | acggtcgcactcattgccaacgctc |
| 9      | VvABF-6   | GSVIVT00031514001   | forward | agttactggcgctggaagagg     |
|        |           |                     | reverse | accagcgactctagctcaactg    |
| 9      | VvABF-7   | GSVIVT00031758001   | forward | gggatttgcgtttgatcccggtg   |
|        |           |                     | reverse | agccgccttatccaagggctccaa  |
| 9      | VvABF-8   | GSVIVT00036604001   | forward | agctcgggtaatggtgggctacag  |
|        |           |                     | reverse | ttaaacacataaggagcaggcga   |
| 9      | VvABF-9   | GSVIVT00037365001   | forward | tgggttgggaattctccgcttcac  |
|        |           |                     | reverse | atctacgctgtcgacgctcca     |
| 10     | VvAP2-4   | GSVIVT00014524001   | forward | gtgcactataaaaggagttcgcca  |
|        |           |                     | reverse | gtccctaaccagagacgagcac    |
| 10     | VvAP2-5   | GSVIVT00025555001   | forward | tcgtggtgtaggcaaagaacc     |
|        |           |                     | reverse | ttctcggcagtcgcaaaagagc    |
| 10     | VvAP2-6   | GSVIVT00029367001   | forward | tgggttgctgagattcgggagcca  |
|        |           |                     | reverse | tcagcttcgtcatatgcaagagc   |

bioRxiv preprint doi: <https://doi.org/10.1101/2019.08.27.280000>; this version posted August 27, 2019. The copyright holder for this preprint (which was not certified by peer review) is the author/funder, who has granted bioRxiv a license to display the preprint in perpetuity. It is made available under aCC-BY-NC-ND 4.0 International license.
